# Supplementary material for: Overexpression of CD47 is associated with brain overgrowth in 16p11.2 deletion syndrome
Source: bioRxiv or medRxiv preprint supplement (doi:10.1101/808022), 2019-10-17
Supplement: Supplementary file [file media-1.pdf]

# Supplementary Figure 1

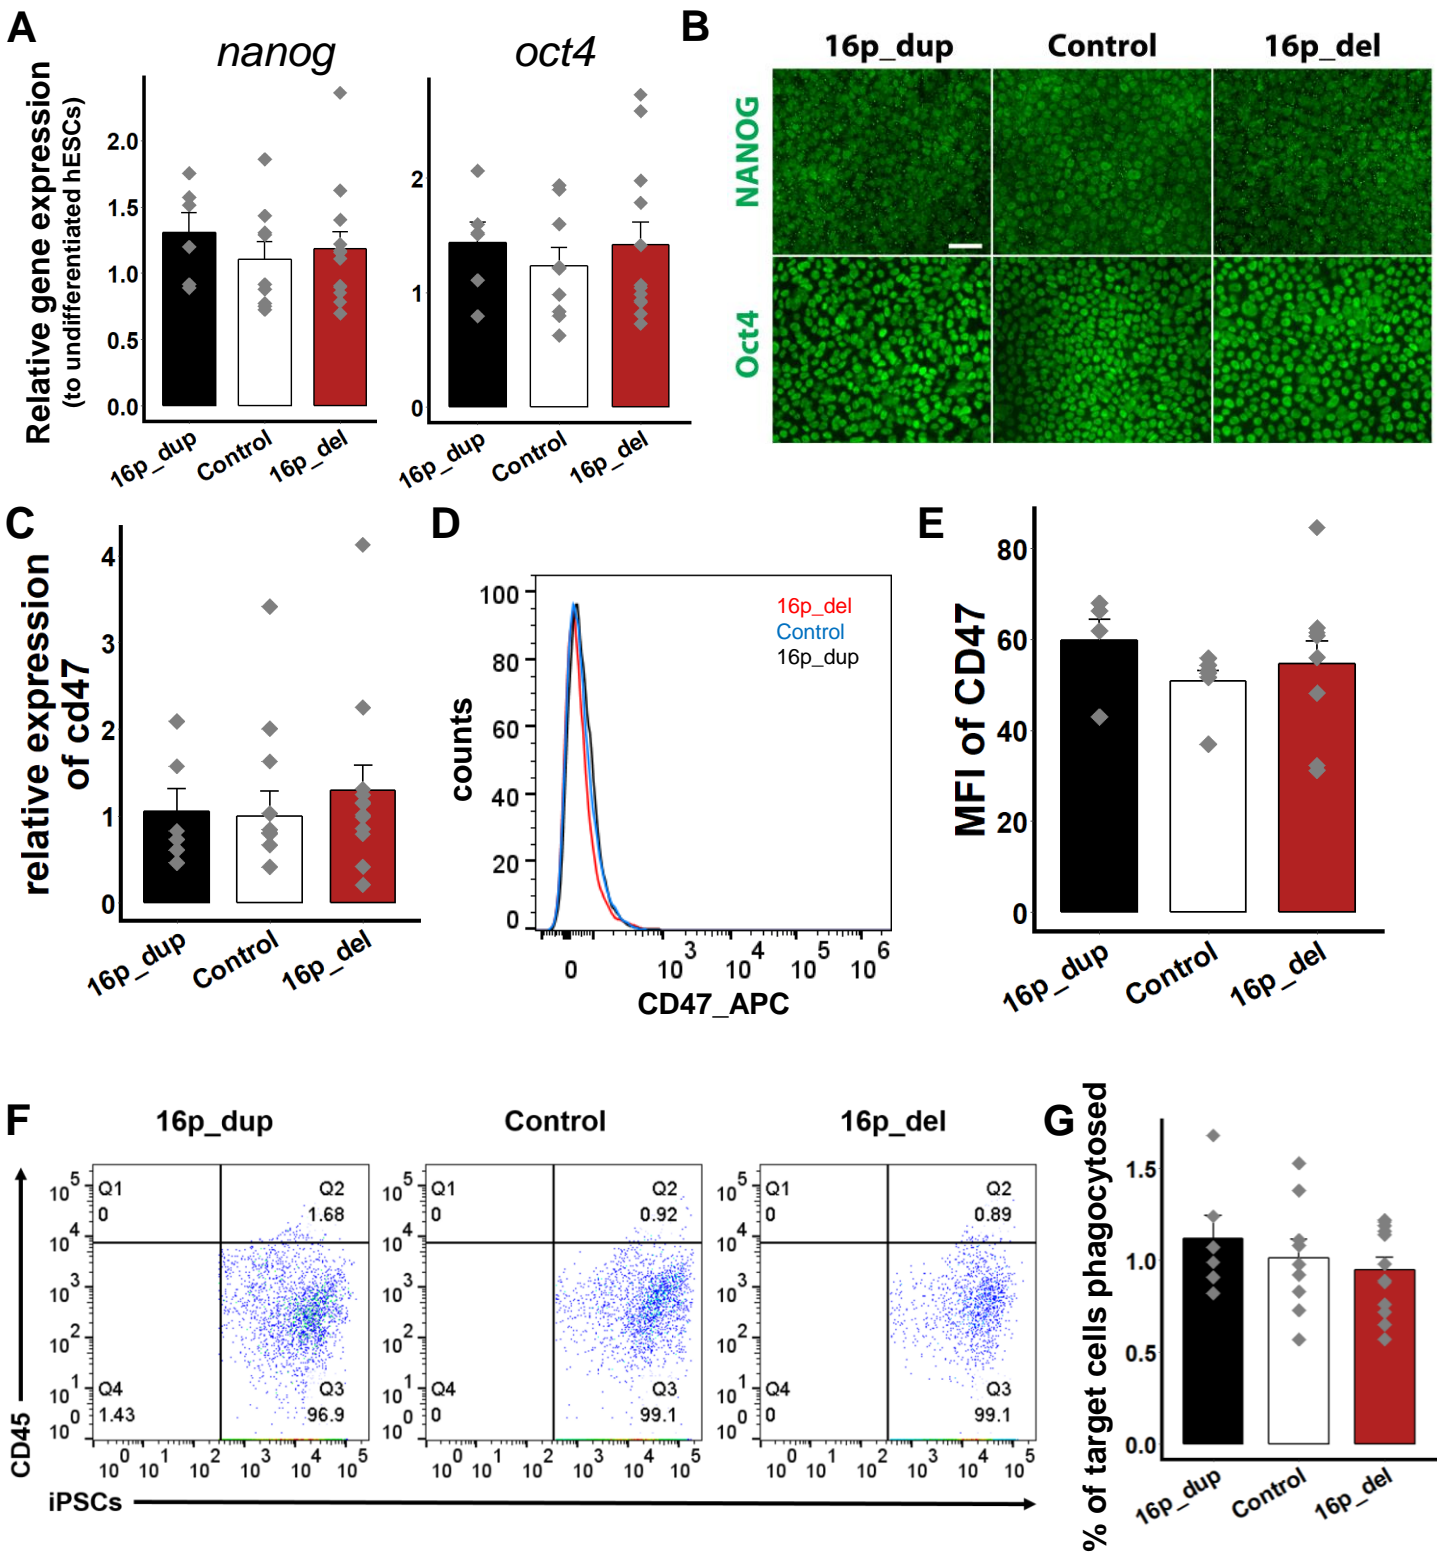

# Supplementary Figure 2

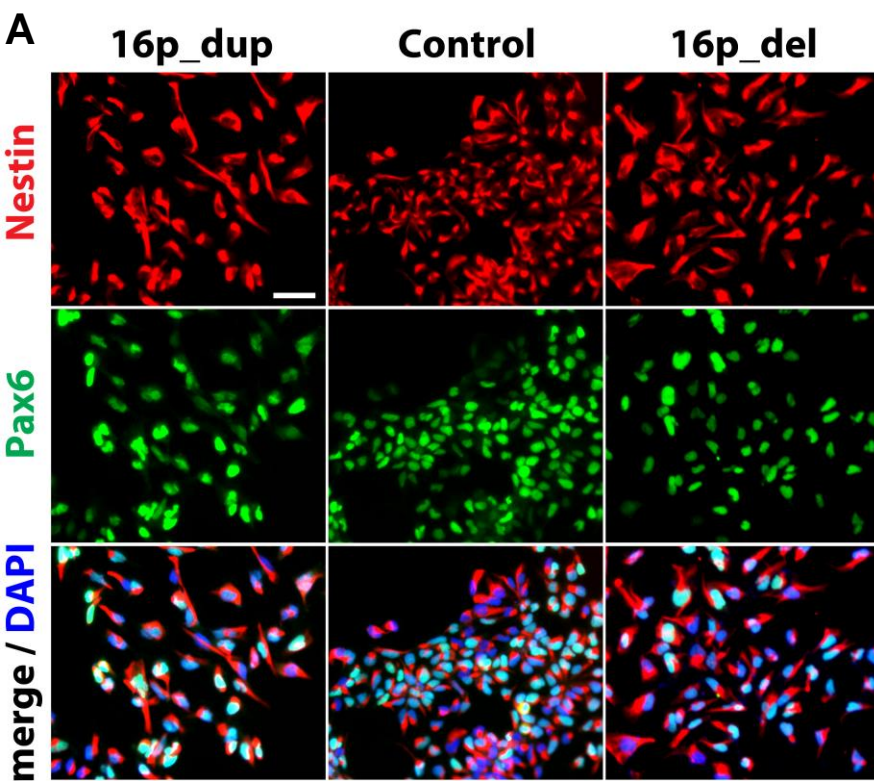

# Supplementary Figure 3

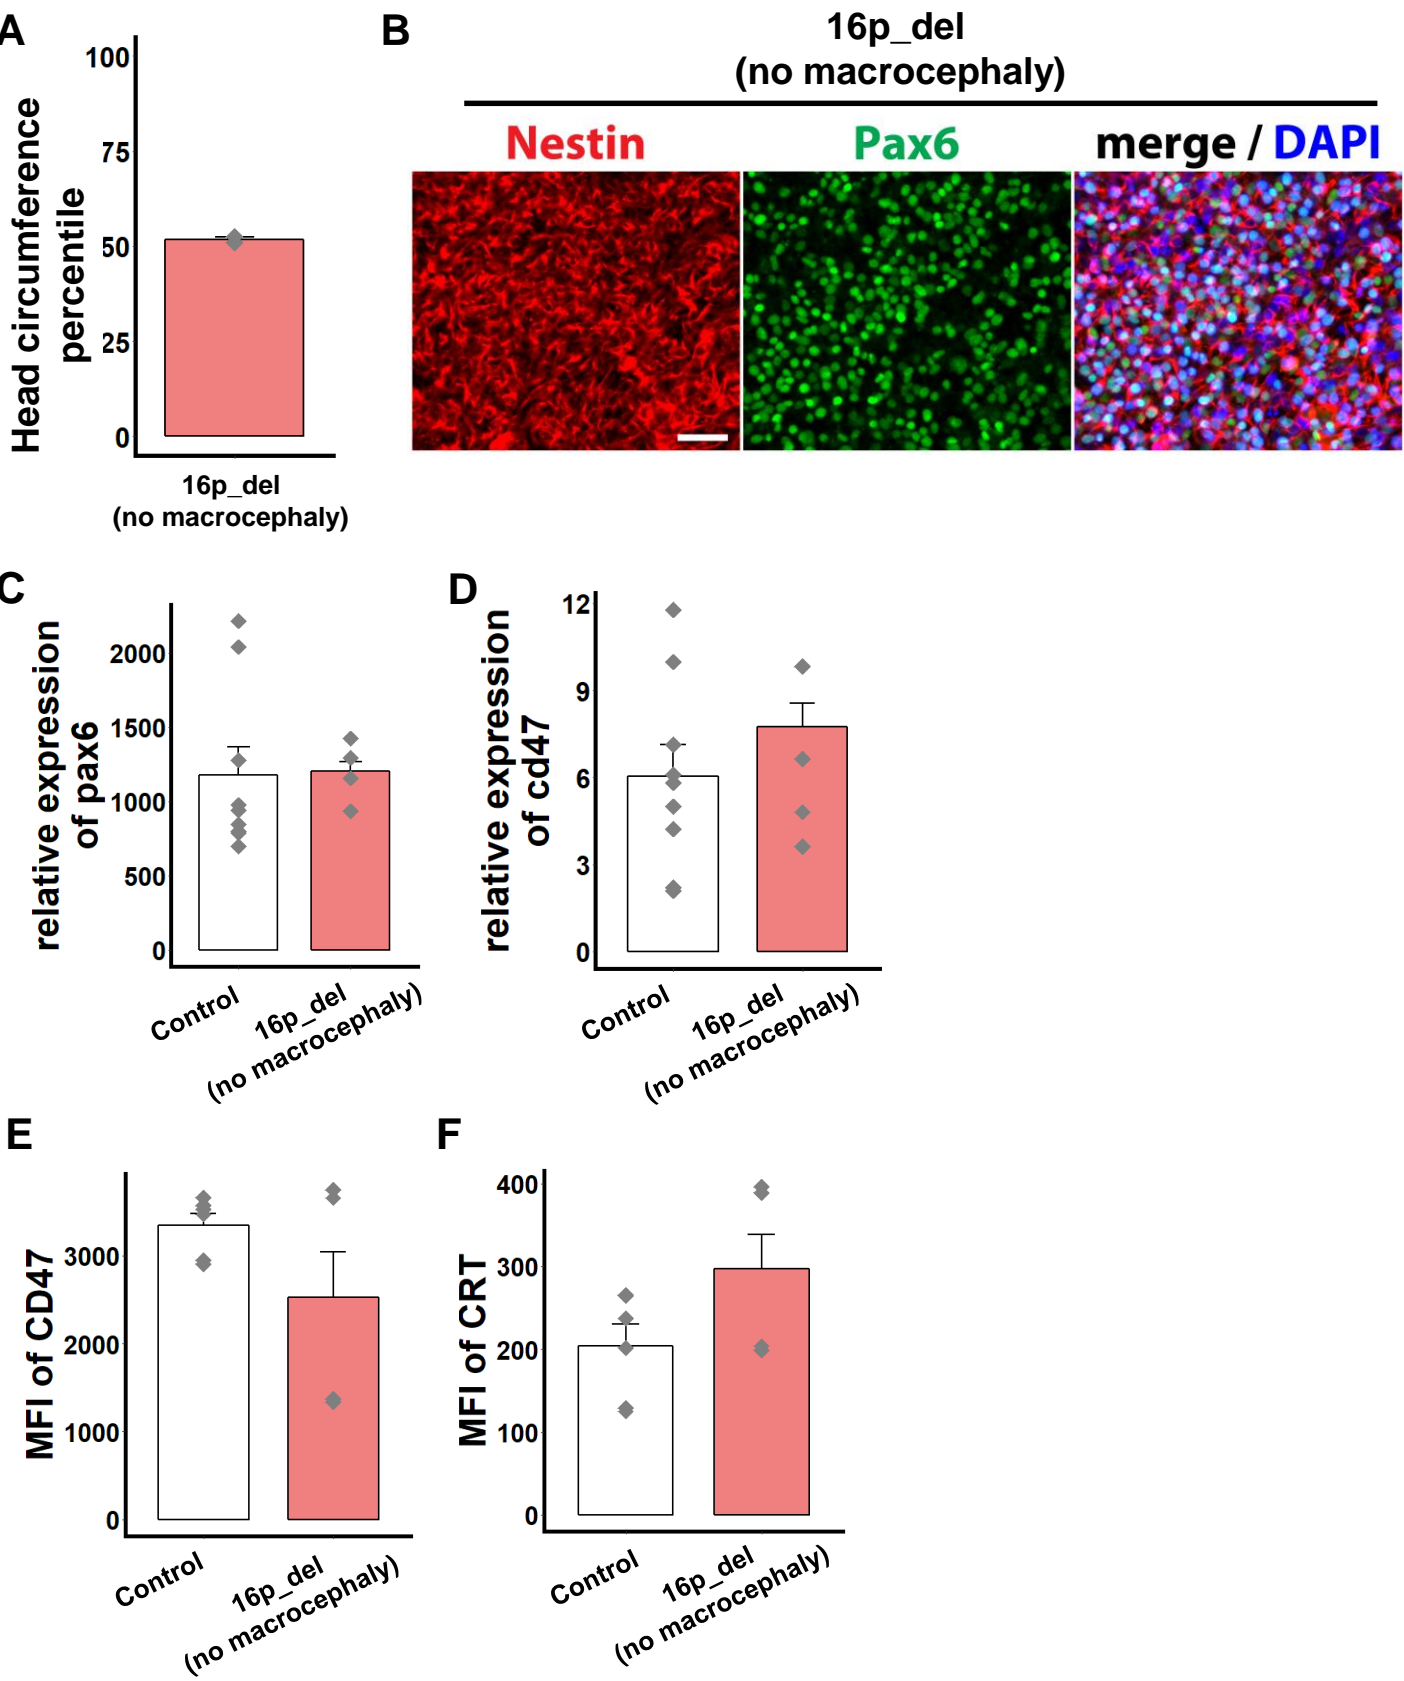

# Supplementary Figure 4

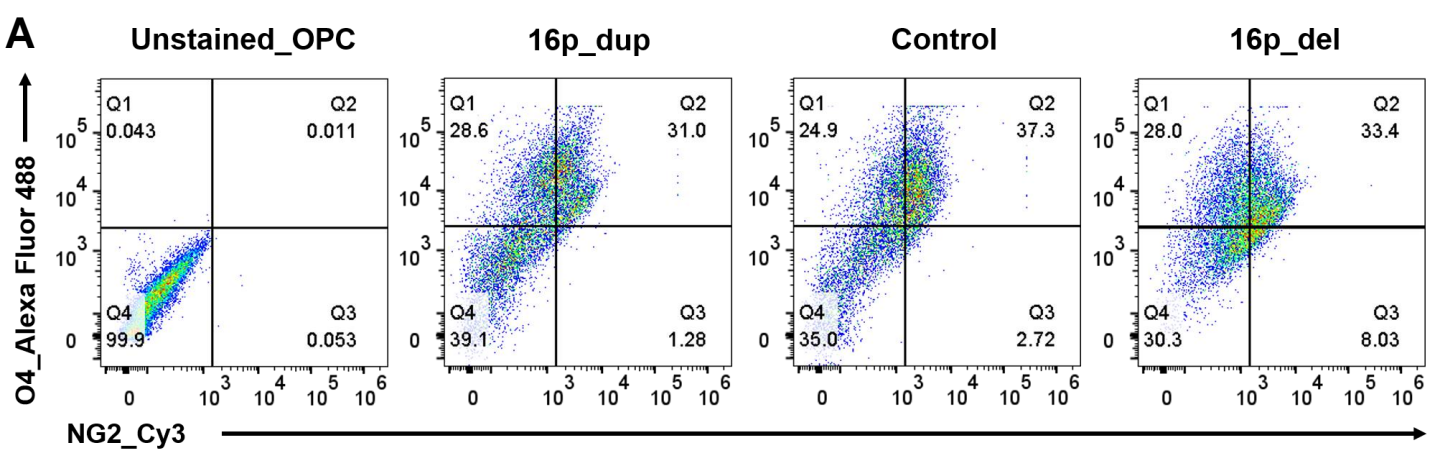

# Supplementary Figure 5

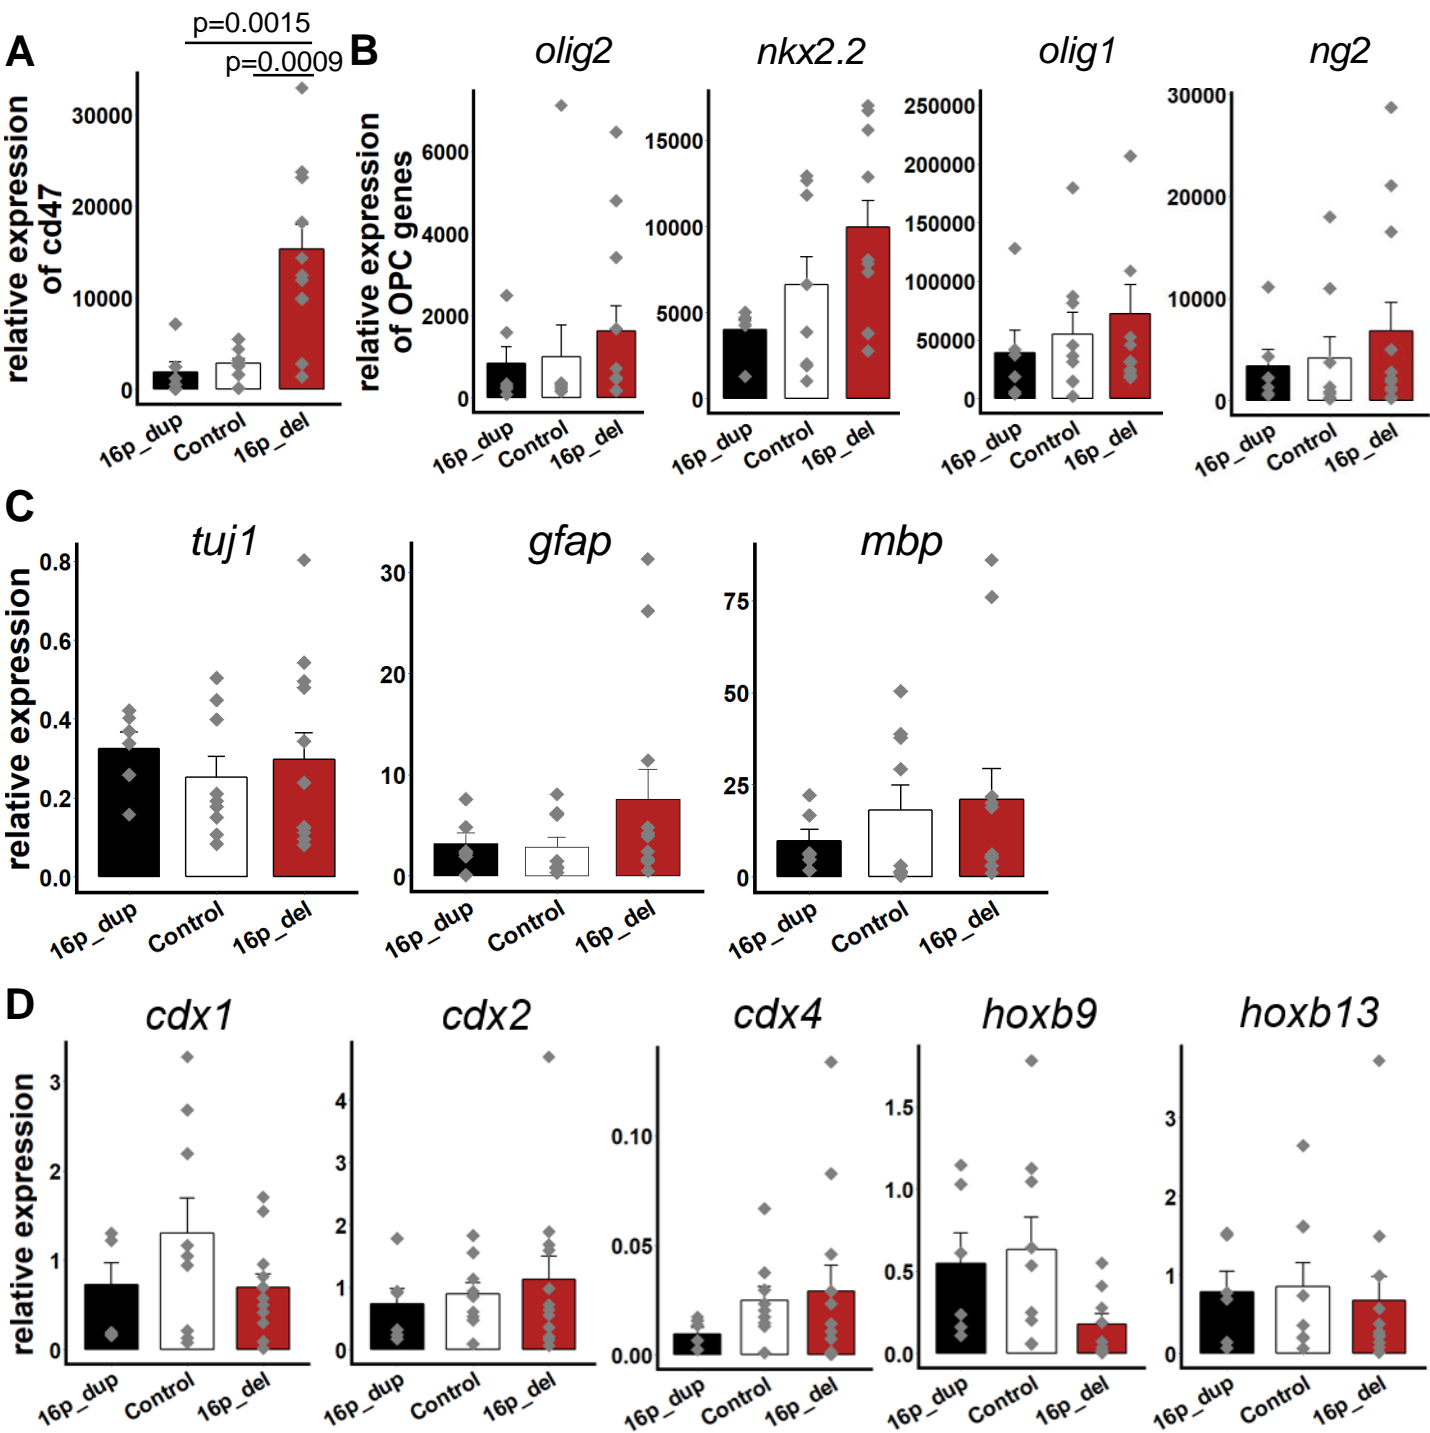

# Supplementary Figure 6

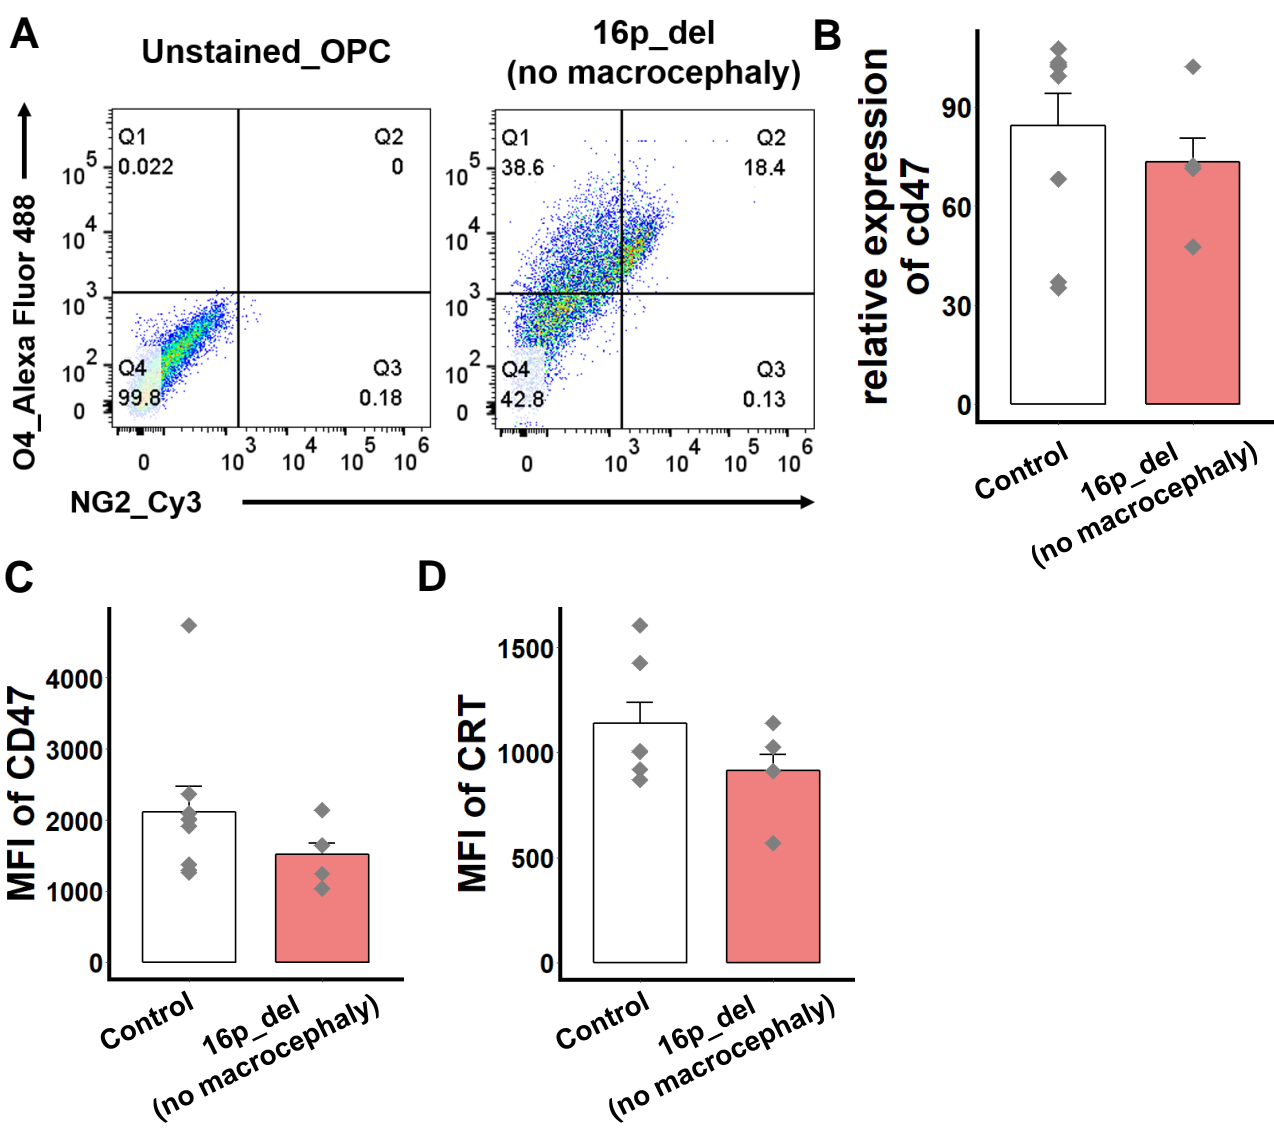

# Supplementary Figure 7

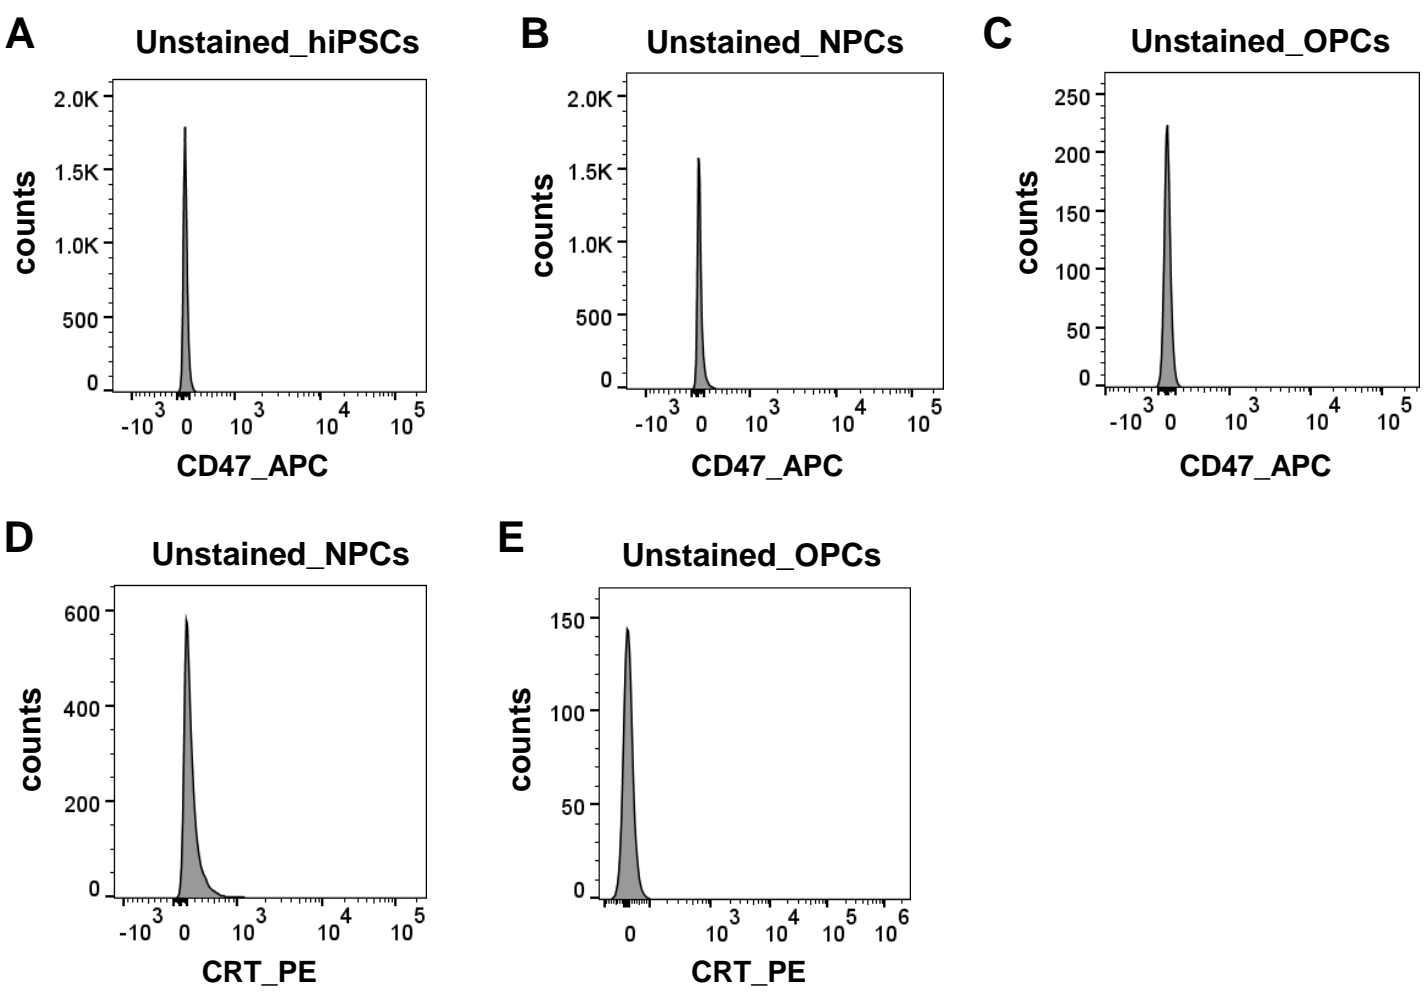

**Supplementary Table 1. Clinical characteristics of 16p11.2 CNV subjects and controls**

| <b>Subject ID</b> | <b>CNV status</b>   | <b>Inheritance</b> | <b>Diagnosis</b>         | <b>Age of Evaluation (months)</b> | <b>Head Circumference Percentile</b> |
|-------------------|---------------------|--------------------|--------------------------|-----------------------------------|--------------------------------------|
| 14756.x16         | 16p11.2-duplication | inherited          | Non-spectrum-diagnosis   | 45                                | 12                                   |
| 14756.x9          | 16p11.2-duplication | unknown            | No diagnosis             | 315                               | 73                                   |
| 14739.x3          | 16p11.2-deletion    | unknown            | Intellectual disability  | 95                                | 99                                   |
| 14765.x2          | 16p11.2-deletion    | unknown            | Intellectual disability  | 152                               | 91                                   |
| 14799.x1          | 16p11.2-deletion    | de-novo            | Autism spectrum disorder | 174                               | 99                                   |
| 14824.x13         | 16p11.2-deletion    | de-novo            | Autism spectrum disorder | 172                               | 99                                   |
| 14763.x7          | 16p11.2-deletion    | de-novo            | Non-spectrum-diagnosis   | 62                                | 48                                   |
| 14746.x8          | 16p11.2-deletion    | inherited          | Autism spectrum disorder | 119                               | 57                                   |
| 8343              | normal              | -                  | No diagnosis             | -                                 | -                                    |
| 2788.3            | normal              | -                  | No diagnosis             | -                                 | -                                    |
| 511               | normal              | -                  | No diagnosis             | -                                 | -                                    |



**Supplementary Table 2. Primer sequences for qRT-PCR.**

| <b>Human Gene</b> | <b>Forward Sequence</b>   | <b>Reverse Sequence</b>  |
|-------------------|---------------------------|--------------------------|
| <i>gapdh</i>      | GGAGCGAGATCCCTCCAAAAT     | GGCTGTTGTCATACTTCTCATGG  |
| <i>cdipt</i>      | TTCTTTCTACTTCATGCCCTG     | CCCAAACCGGGTTCCTT        |
| <i>coro1a</i>     | TGTC AACCTAAGTTTGTGG      | TTCTTGCCACACGTCCA        |
| <i>ppp4c</i>      | GCACTGAGATCTTTGACTACC     | TCGGTCGATTGTCCGAAT       |
| <i>qprt</i>       | CTGGTGCCGACCTTGT          | GAACTGGGCCTTCAGCA        |
| <i>ypel3</i>      | CAGGCCTACTTGGATGATTG      | TGAGTTGAAGAGGTAGGCA      |
| <i>pax6</i>       | GCAGATGCAAAGTCCAGGTG      | CAGGTTGCGAAGAACTCTGTTT   |
| <i>cd47</i>       | AGAATTCACGTTTTGTAATGACACT | GTGGGGACAGTGGACTTGTT     |
| <i>olig2</i>      | TGCGCAAGCTTTCCAAGAT       | CAGCGAGTTGGTGAGCATGA     |
| <i>nkx2.2</i>     | GACA ACTGGTGGCAGATTTGCTT  | AGCCACAAAGAAAGGAGTTGGACC |
| <i>olig1</i>      | TGCTATGACCTTTCCGCAGT      | ACACCGTCAGGAAACAAGGT     |
| <i>ng2</i>        | CTTCATCCACGATGGCTCTGA     | TGGGCAGGAGGTATGTTTGG     |
| <i>pdgfra</i>     | GGGCACGCTCTTTACTCCAT      | ACAGCCTAAGACCAGGAACG     |
| <i>mbp</i>        | GGCAAGGTACCCTGGCTAA       | GGGTGGTGTGAGTCCTTGTA     |
| <i>gfap</i>       | AAGATCCACGAGGAGGAGGTT     | TGCGTGCGGATCTCTTTGAG     |
| <i>tuj1</i>       | GGCCAAGGGTCACTACACG       | GCAGTCGCAGTTTTTCACACTC   |
| <i>cdx1</i>       | GGTTACAGAATCACAGCCCTC     | CTTGGTCCGAATAAAGTCCTC    |
| <i>cdx2</i>       | GGGCTCTCTGAGAGGCAGGT      | CCTTTGCTCTGCGGTTCTG      |
| <i>cdx4</i>       | AGTCTGGGGCTCACCTAC        | CTGTGCCATTGTACTAGACG     |
| <i>hoxb9</i>      | CCGTCTACCACCCTTACATCC     | CGTAGCCGGGTCTTTGATTAG    |
| <i>hoxb13</i>     | AGCTCCCGTGCCTTATGGTTA     | GGCTGGTAGGTTCCCGGATA     |
